# Supplementary material for: Comparing conventional and novel extraction methods for chia seed mucilage as a sustainable vegan thickening agent
Source: Royal Society of Chemistry journal article supplement (doi:10.1039/d4fb00309h), 2024-12-27
Supplement: d4fb00309h1.pdf [file d4fb00309h1.pdf]

1  
2  
3  
4  
5  
6  
7  
8  
9  
10  
11  
12  
13  
14  
15  
16  
17  
18  
19  
20  
21  
22  
23  
24  
25  
26

**Supplementary File**

**Comparing conventional and novel extraction methods for chia seed mucilage as a sustainable vegan thickening agent**

Qiu Yi Tan<sup>a</sup>, Divyang Solanki<sup>a</sup>, Regis Badin<sup>ab</sup>, Sangeeta Prakash<sup>a</sup>

<sup>a</sup>School of Agriculture and Food Sustainability, The University of Queensland, St. Lucia,  
QLD 4072, Australia

<sup>b</sup>Université de Lorraine, LIBio, Nancy, F-54000, France

Corresponding author: Room no C406, Hartley Teakle, School of Agriculture and Food  
Sciences, The University of Queensland, Brisbane, QLD, 4072, Australia.

E-mail addresses: s.prakash@uq.edu.au (S. Prakash)
